# Supplementary material for: Optimization and Characterization of the F-LSR Manufacturing Process Using Quaternary Ammonium Silanolate as an Initiator for Synthesizing Fluorosilicone
Source: MDPI journal article supplement (doi:10.3390/polym14245502), 2022-12-15
Supplement: s1 [file s1]

## Supporting information

# Optimization and Characterization of the F-LSR Manufacturing Process Using Quaternary Ammonium Silanolate as an Initiator for Synthesizing Fluorosilicone

Jae Il So, Chung Soo Lee, Ji Young Jung, Jaewon Lee, Jin Kyu Choi, Sang Eun Shim and Yingjie Qian

### Initiator

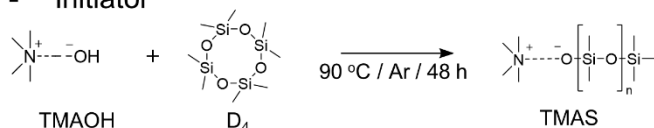

### Fluorosilicone

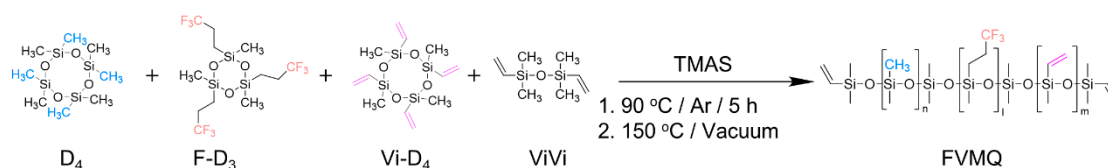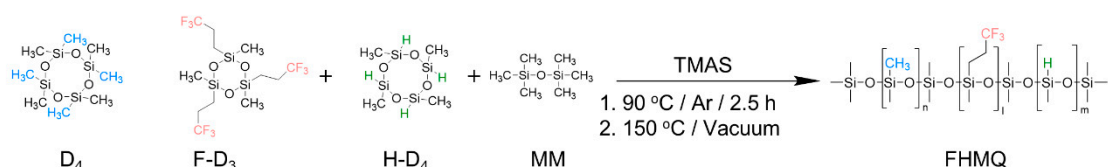

### Liquid silicone rubber

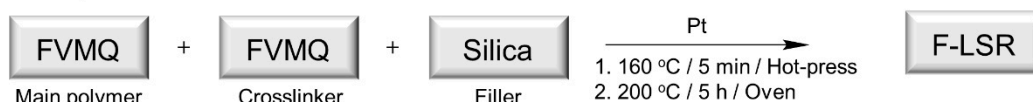

**Figure S1.** Description of synthetic methods of TMAS, FVMQ, FHMQ, and F-LSR.

### Retraction apparatus (ASTM: D1329–16)

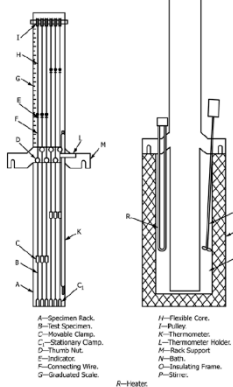

### Specimens (ASTM: D1329–16)

|   | mm  | in   |
|---|-----|------|
| A | 25  | 1    |
| B | 2.0 | 0.08 |
| C | 6.4 | 0.25 |

### Device

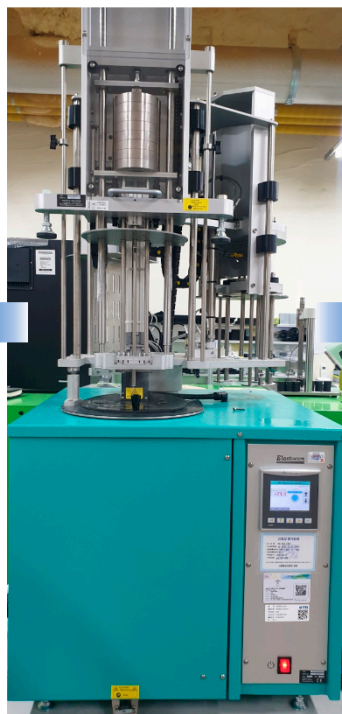

### Striking apparatus (ASTM: D746–20)

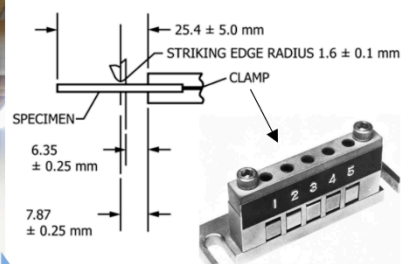

### Specimens (ASTM: D746–20)

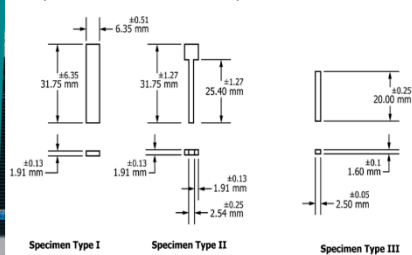

**Figure S2.** Testing methods of TR-test (ASTM: D1329–16) and brittleness test at low temperature (ASTM: D746–20).

**Table S1.** Composition of the reactants for optimizing FVMQ synthesis.

| Sample       | Recipe                   |                  |                   |      | Initiator<br>(wt%) | Time<br>(h) | Variable                |
|--------------|--------------------------|------------------|-------------------|------|--------------------|-------------|-------------------------|
|              | Monomer ratio<br>(mol %) |                  |                   |      |                    |             |                         |
|              | D <sub>4</sub>           | F-D <sub>3</sub> | Vi-D <sub>4</sub> | ViVi |                    |             |                         |
| FVMQ-0.5 h   | 75                       | 75               | 0                 | 1    | 0.2                | 0.5         | Reaction<br>time        |
| FVMQ-1 h     |                          |                  |                   |      |                    | 1           |                         |
| FVMQ-1.5 h   |                          |                  |                   |      |                    | 1.5         |                         |
| FVMQ-2 h     |                          |                  |                   |      |                    | 2           |                         |
| FVMQ-2.5 h   |                          |                  |                   |      |                    | 2.5         |                         |
| FVMQ-3 h     |                          |                  |                   |      |                    | 3           |                         |
| FVMQ-3.5 h   |                          |                  |                   |      |                    | 3.5         |                         |
| FVMQ-4 h     |                          |                  |                   |      |                    | 4           |                         |
| FVMQ-0.1 wt% | 75                       | 75               | 0                 | 1    | 0.1                | 3           | Amounts of<br>initiator |
| FVMQ-0.2 wt% |                          |                  |                   |      | 0.2                |             |                         |
| FVMQ-0.3 wt% |                          |                  |                   |      | 0.3                |             |                         |
| FVMQ-0.5 wt% |                          |                  |                   |      | 0.5                |             |                         |
| FVMQ-0.7 wt% |                          |                  |                   |      | 0.7                |             |                         |
| FVMQ-1 wt%   |                          |                  |                   |      | 1                  |             |                         |

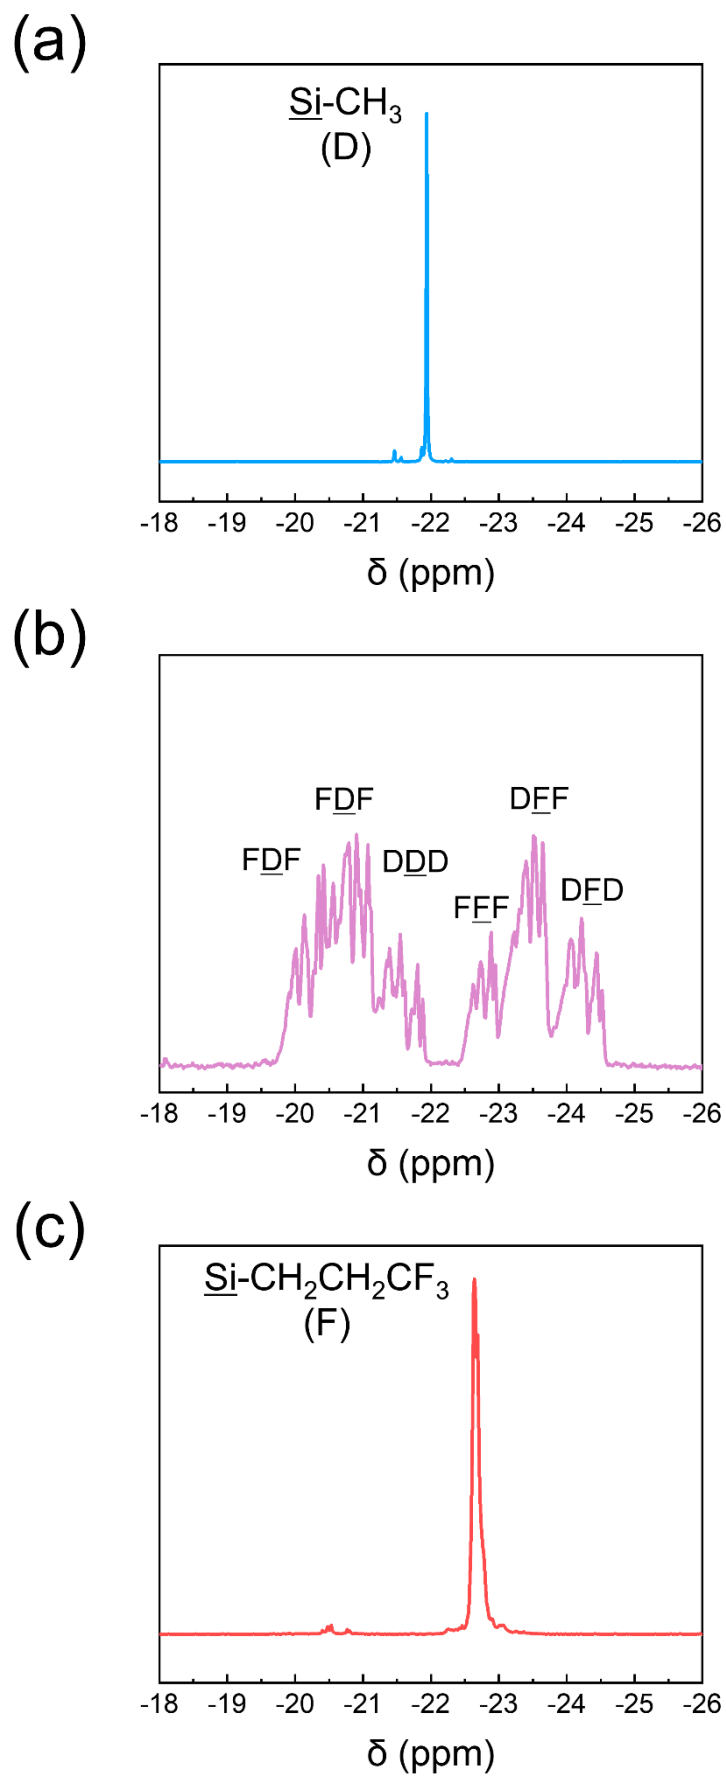

**Figure S3.**  $^{29}\text{Si}$ -NMR spectra of FVMQs: (a) FVMQ-400-f0, (b) FVMQ-400-f5, and (c) FVMQ-400-f10.

**Table S2.** Composition of reactants for optimizing the synthesis of FHMQ.

| Sample     | Recipe         |                  |                  |    |           |      | Variable      |
|------------|----------------|------------------|------------------|----|-----------|------|---------------|
|            | D <sub>4</sub> | F-D <sub>3</sub> | H-D <sub>4</sub> | MM | Initiator | Time |               |
| FHMQ-1.5 h |                |                  |                  |    |           | 1.5  |               |
| FHMQ-2.5 h |                |                  |                  |    |           | 2.5  |               |
| FHMQ-3.5 h | 1.5            | 1.5              | 1                | 1  | 0.1 wt%   | 3.5  | Reaction time |
| FHMQ-4.5 h |                |                  |                  |    |           | 4.5  |               |

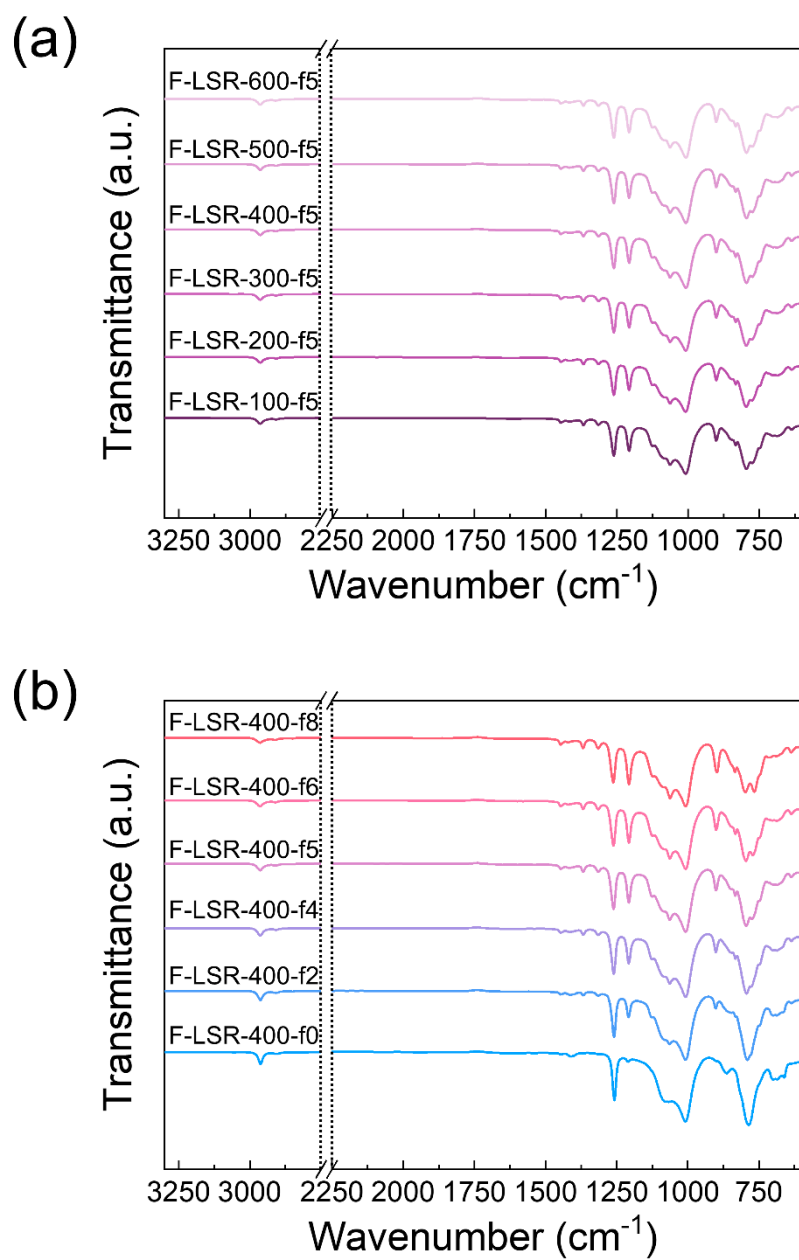

**Figure S4.** FT-IR spectra of F-LSRs: (a) F-LSR-100-f5–F-LSR-600-f5 and (b) F-LSR-400-f0–F-LSR-400-f8.

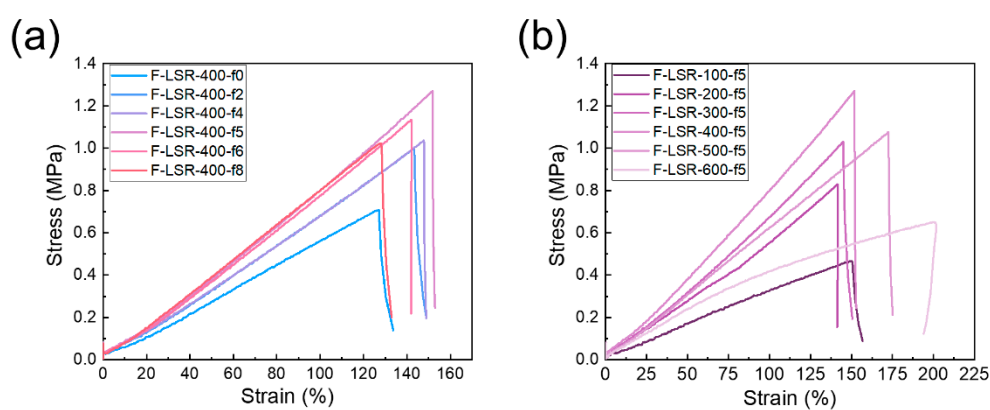

**Figure S5.** Stress-strain curves of F-LSRs: (a) F-LSR-100-f5–F-LSR-600-f5 and (b) F-LSR-400-f0–F-LSR-400-f8.

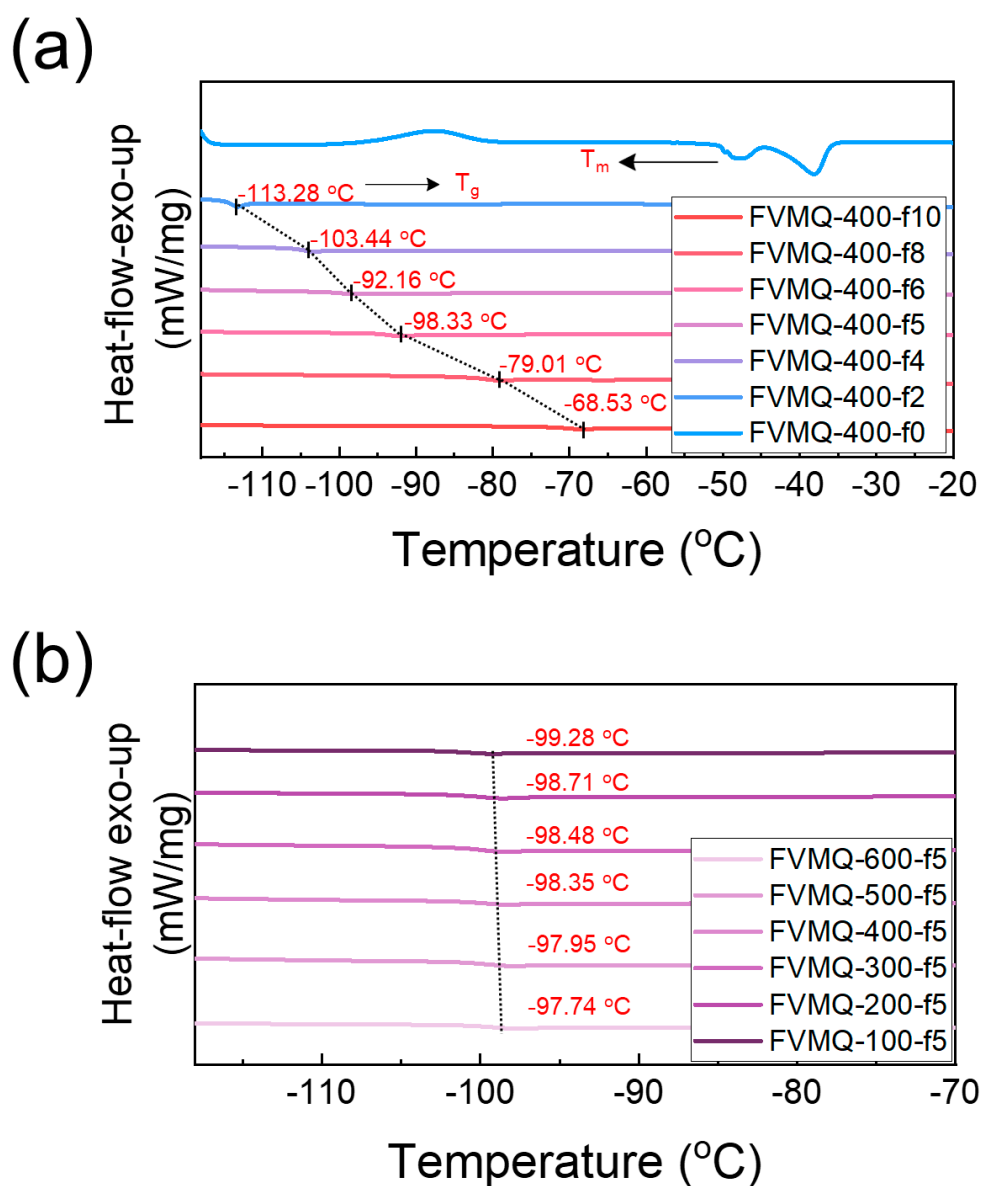

**Figure S6.** DSC curves of F-LSRs with (a) different fluorine ratios and (b) different chain lengths.
